# Supplementary figures and images for: Ventriculitis: A Severe Complication of Central Nervous System Infections
Source: PubMed Central journal article supplement — Open Forum Infect Dis. 2021 Apr 29;8(6):ofab216. doi: 10.1093/ofid/ofab216 (PMC8176394; doi:10.1093/ofid/ofab216), 2021-04-29

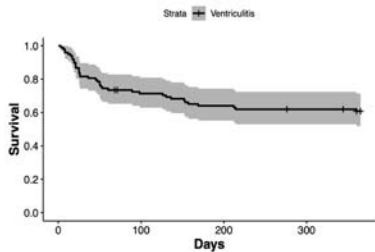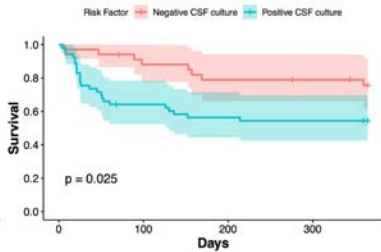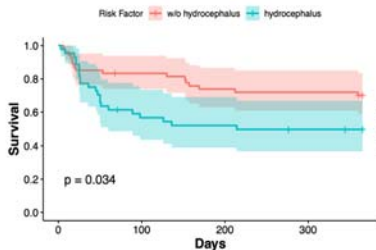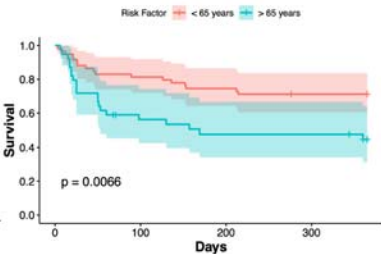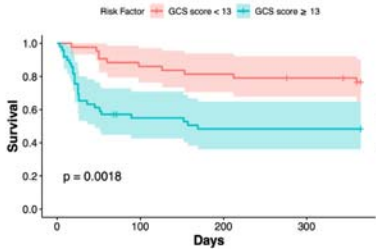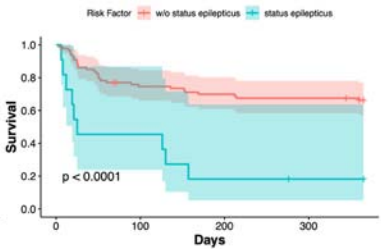

Supplement: ofab216_suppl_supplementary_figure_s1.pdf [file ofab216_suppl_supplementary_figure_s1.pdf]
